# Supplementary material for: New approach to improve the conductivity of apatite-type lanthanum germanate La9.33Ge6O26 as electrolyte for IT-SOFCs
Source: Royal Society of Chemistry journal article supplement (doi:10.1039/c4ra00713a), 2014-01-01
Supplement: c4ra00713a1.pdf [file c4ra00713a1.pdf]

## Supplementary Information

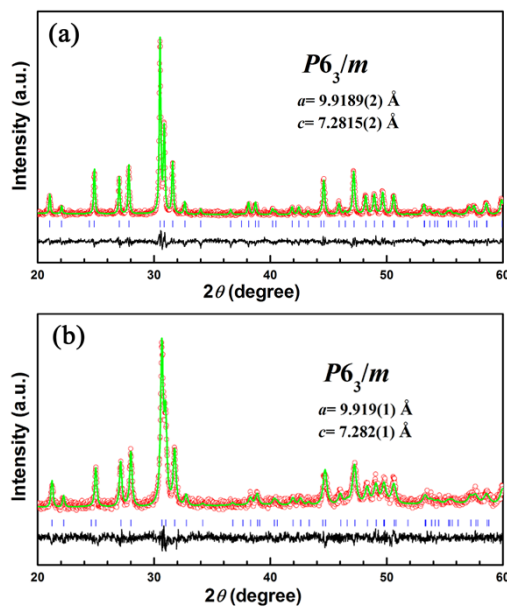

**Fig. S1** Rietveld refinement of the XRD patterns of  $\text{La}_{9.33}\text{Ge}_6\text{O}_{26}$  powders synthesized by MSS method (a) at 900 °C for 4 h and that synthesized by SSS method (b) at 1100 °C for 4 h, respectively.
